# Supplementary material for: Drosophila Cappuccino alleles provide insight into formin mechanism and role in oogenesis
Source: PubMed Central journal article supplement — Mol Biol Cell. 2015 May 15;26(10):1875–86. doi: 10.1091/mbc.E14-11-1558 (PMC4436832; doi:10.1091/mbc.e14-11-1558), 2015-05-15
Supplement: supp_E14-11-1558v1_CombinedSupMats.pdf [file supp_E14-11-1558v1_CombinedSupMats.pdf]

# Supplemental Materials

*Molecular Biology of the Cell*

Yoo et al.

# Supplemental Material

|            |                                                |                                                  |                                                  |                                    |                             |                      |                    |            |                   |       |
|------------|------------------------------------------------|--------------------------------------------------|--------------------------------------------------|------------------------------------|-----------------------------|----------------------|--------------------|------------|-------------------|-------|
| Dm_CapuCT  | FHRTNTRKSSAVNPPKPMRLYLWTRIVTSAPPA              | PRPPSVANSTDSSTENSGSSPDEPPAANGADAPPTAPPA          | TKEIWTEIETPL                                     | NI                                 | DEFTELFSRQAIAPVSK           | 681                  |                    |            |                   |       |
| mFmn1      | -----RKPALIEPSCPMKPLYLWTRIQINDKSG              | -----                                            | DAAPTLDWDSLEEPHIR                                | T                                  | SEFEYLFKSDTTQKKKKP          | 1044                 |                    |            |                   |       |
| hFMN1      | -----RKPALIEPSCPMKPLYLWTRIQISDRSQ              | -----                                            | NATPTLDWDSLEEPDIR                                | P                                  | SEFEYLFKSDTTQKKKKP          | 1033                 |                    |            |                   |       |
| mFmn2      | -----RKQLEPSCPMPKPLYLWTRIQIQLHSKRD             | -----                                            | SSPSLIWEKIEEPSI                                  | C                                  | HEFEELFSKTAVKERKKP          | 1199                 |                    |            |                   |       |
| hFMN2      | -----RKQLEPSCPMPKPLYLWTRIQIQLHSKRD             | -----                                            | SSTSLIWEKIEEPSI                                  | C                                  | HEFEELFSKTAVKERKKP          | 1343                 |                    |            |                   |       |
| mFHOD1     | -----DGRPHPTKRKTVKLFWRELKLTGGPG                | -----                                            | CSRSRFGCPPTLWASLEPVS                             | T                                  | ARLEHLFESRAKOVLPK           | 714                  |                    |            |                   |       |
| YsBni1     | -----FEKVPYRPHKCLKQLHWEKLDCT                   | -----                                            | DNSIWTGKAEKFA                                    | D                                  | LYEKGVLDLEKAFAREIKSL        | 1407                 |                    |            |                   |       |
| mDia1      | -----PKVYKPEVQLRRPNWSKFVAEDLS                  | -----                                            | QDCFWTKVKEDRFE                                   | NNELF                              | AKLTAFSAQTKTSKAKK           | D-QE816              |                    |            |                   |       |
| mDia2      | -----QKKLYKPDIPMKRINWSKIEPKELS                 | -----                                            | ENCVWLKLEEKYE                                    | NADLF                              | AKLALTPSQMKGQRNTE           | A687                 |                    |            |                   |       |
| mDia3      | -----PKKEFKPEISMRRLNWLKIGPNEMS                 | -----                                            | ENCFWIKVNNENKYE                                  | NRDLL                              | CKLENTFCCEKKEKRNTE          | D-F-678              |                    |            |                   |       |
| mINF2      | -----HRVNPPTLRMKKLNWQKLPNSVAR                  | -----                                            | ERNSMWATLGSFCTAAVEPDF                            | SSIEQLFSFPTAK                      |                             | 647                  |                    |            |                   |       |
| mDAAM1     | -----LKNIPQPTNALKSFNWSKLPENKLD                 | -----                                            | GTVWTEIDDTKVF                                    | KILDL                              | EDLERTFSAYQRQEPFVNNSKQKEA68 | 668                  |                    |            |                   |       |
| hFMNL1     | -----AKKPIQTKFRMPLLNWALKPSQIT                  | -----                                            | GTVTELDNDEKVL                                    | QELDM                              | SDFEEQFKTKSQGPSLDSALKSKAA   | 700                  |                    |            |                   |       |
| mDelphilin | -----HRSRSTSHMSVKRLRWEQVENS                    | -----                                            | EGTIWGLGSDSDYDKLSDMVKYLDLLEHFGTQKPKP             |                                    |                             | 870                  |                    |            |                   |       |
| Dm_CapuCT  | -----PKELKVKRAKSIKVLDPERSRNVGIWRSLSH           | -----                                            | VPSSEIEHAIYHID                                   | TSVVSLEALQHS                       | NIQATEDELQR                 | KEAA                 | GGDIPLDHPEQ        | LDI        | SL773             |       |
| mFmn1      | -----LSEAYEKKNKVKIKLLDGRKRSQTVGILISLH          | -----                                            | LEMKDQQAIPTVD                                    | DSVVDETLAALY                       | ENRAQEDELTK                 | RKYETS               | EEDLKLDDKPEQ       | HEL        | AQ1144            |       |
| hFMN1      | -----LSEAYEKKNKVKIKLLDGRKRSQTVGILISLH          | -----                                            | LEMKDQQAIPTVD                                    | DSVVDETLAALY                       | ENRAQEDELTK                 | RKYETS               | EELKLDDKPEQ        | HEL        | AQ1444            |       |
| mFmn2      | -----ISDTISK-TKAKQVVKLLSNKRSQAVGILMSLH         | -----                                            | LDMDIQHAVNLD                                     | NSVVDETLQALY                       | ENRAQSELEK                  | EKHSRSKDKENAKSLDKPEQ | FYEL               | SL1299     |                   |       |
| hFMN2      | -----ISDTISK-TKAKQVVKLLSNKRSQAVGILMSLH         | -----                                            | LDMDIQHAVNLD                                     | NSVVDETLQALY                       | ENRAQSELEK                  | EKHSRSKDKENAKSLDKPEQ | FYEL               | SL1443     |                   |       |
| mFHOD1     | -----K-AGEGRRTTAVVLDPKRSNAINIGLTLTP            | -----                                            | PVHVIKAAALNFD                                    | EFAVSKDGIKLL                       | TMMPTTEERQK                 | EEAQ                 | LAMPDVLGPAENF      | ITL        | AS805             |       |
| YsBni1     | -----ASKRKEDLQKITFLSRDISQFGINLHMYSLSVADLVK     | -----                                            | ILNCDRDFLQTPSVVFLSKSE                            | IEVSVNLARNYAPYSTDWE                | V                           | RNLEDAKPEKDPNDLQADQI | YI                 | QLMVNL1521 |                   |       |
| mDia1      | -----GGEKKSV-QKKVKELKVLDSKTAQNLSIFLGSFR        | -----                                            | MPYQEIKNVILEVN                                   | EAVLTESMIQNL                       | KQMPPEQLKML                 | SE                   | LKEEYDDLAESEQFGVM  |            | GT912             |       |
| mDia2      | -----AENRSRGP-PKKVKELRLIDTKTAQNLSIFLGSFR       | -----                                            | MPYEQEIKNVILEVN                                  | EEMLSALIQNL                        | KYLPDQNALRE                 | AQ                   | LKSEYDDLCEPEQFGVM  |            | ST783             |       |
| mDia3      | -----DEKKV-IKKMKELKFLDPKIAQNLSIFLGSFR          | -----                                            | VPYEKIRTMILEVD                                   | ETQLSEMIQNL                        | KHLPDEEQLKSL                | SQ                   | FVDSYNSLCEPEQFVAVM |            | SN771             |       |
| mINF2      | -----PKEPSAAP-ARKEPKEVTPDLSKSLNINIFLKQFK       | -----                                            | CSNEEVTSMIQAGD                                   | TKSPDVEVLKQLL                      | KLPEKHEIENL                 | RA                   | FTERAKLSNADQFVYLL  |            | LD743             |       |
| mDAAM1     | -----DAIDDTLS-SKLVKELSVIDGRRAQCNILLRSLK        | -----                                            | LSNDEIKRAILTMDEQEDL                              | PKDMLQQLL                          | KFVPEKSIDL                  | EE                   | HKHLEDMKADRF       | FEM        | SR765             |       |
| hFMNL1     | -----QK-----APSKATLIEANRAKNAITLRKGN            | -----                                            | LGAERICQAI                                       | EAY-DI                             | QALGDLFELLM                 |                      | RFLPTEYERSL        | TRFER      | EQRPMELSEEDRFLMCF | SR790 |
| mDelphilin | -----PVPGEPPFRKKEVEILSHKAYNTSILLHLK            | -----                                            | LTPGELRQVLSME                                    | PRRLEPAHLAQLL                      | LFAPDADEEQR                 | QA                   | FREAPGRLESDPQFVLM  |            | LS964             |       |
| Dm_CapuCT  | ISMASERISCIQVFAEFESVTLFRKLETVSLSQSLIESEDLKLVFS | ILTLGNYMNGNQRQADGPNLDILGKLVKS                    | KESHTTLHFIVRTYIAQRKE                             |                                    |                             |                      |                    |            | 879               |       |
| mFmn1      | IPNFAERAQCIIFRAVSEGLTSLHRKVEIVTRASKGLLHMKSVD   | ILALILAFGNMNGNTRGQADGYSLEILPKLVKS                | RDNGMNLVDVYVVKYLLRYDQCKHHDQASCRGKD               |                                    |                             |                      |                    |            | 1263              |       |
| hFMN1      | IPNFAERAQCIIFRSVSEGLTSLHRKVEIITRASKDILLHVSKVD  | ILALILAFGNMNGNTRGQADGYSLEILPKLVKS                | RDNGINLVDVYVVKYLLRYDQCKHHDQASCRGKD               |                                    |                             |                      |                    |            | 1238              |       |
| mFmn2      | IPNFSERVFCILQSTFSESICIRKLELQKLCETLKNQPGVMQVGLV | LAFGNMNGNTRGQADGGLDILPKLVKS                      | SDNSRSLLSYVSYLRNFDE                              |                                    |                             |                      |                    |            | 1404              |       |
| hFMN2      | IPNFSERVFCILQSTFSESICIRKLELQKLCETLKNQPGVMQVGLV | LAFGNMNGNTRGQADGGLDILPKLVKS                      | SDNSRSLLSYVSYLRNFDE                              |                                    |                             |                      |                    |            | 1548              |       |
| mFHOD1     | IGGLAARLQWAFKLDYSEMERIEAEPFLDKVGMQVHNATFR      | CILATLAVGNFLNGS                                  | QSSGFELSYLEKVS                                   | VKDV                               | TVRRQSLLYHLCSLVQTRPSSD      |                      |                    |            | 908               |       |
| YsBni1     | ESYWGSRMRALTVVTSYEREYNELAKLRKVDKAVSALQESD      | NLRNPNVILAVGNFMNDTSK                             | QAQGFKLSLQRLTFIKD                                | TNSTMFTLNYVEI                      | IVRLNYPSPND                 |                      |                    |            | 1626              |       |
| mDia1      | VPRLRPRNALIPKQFSEQVENIKPEIVSVTAACEELRKS        | ENFSSLELTLVGNMNGNTRGQADGYSLEILPKLVKS             | ADQKMTLLHFLAELCENHDPVLR                          |                                    |                             |                      |                    |            | 1019              |       |
| mDia2      | VKMLRPRLTSILFKLTFEEHVNINIKPISIAVTLACEELKKS     | SESPKRLLELTLVGNMNGNTRGQADGYSLEILPKLVKS           | ADQKMTLLHFLAELCENHDPVLR                          |                                    |                             |                      |                    |            | 890               |       |
| mDia3      | VKRLRPRLSAILFKLQFEEQVNNIKPDIAMAVSTACEEIKKS     | GFGSKLLELTLVGNMNGNTRGQADGYSLEILPKLVKS            | ADQKMTLLHFLAELCENHDPVLR                          |                                    |                             |                      |                    |            | 878               |       |
| mINF2      | IPCYPLRVECMMLCEGTAIVLDMVRPKAQLVLTACESSLTS      | RQLPVFCQVLLKIGNLFNYSHT                           | GDADGFKISTLKLK                                   | TKS                                | QOSRVTLHLHVLVEVENKSHDLDLQ   |                      |                    |            | 850               |       |
| mDAAM1     | INHYQQRISLYPKFAERVAEVKPKVEAIRSGSEVFRSQR        | LQVLLVAFGNMNGNTRGQADGYSLEILPKLVKS                | ADQKMTLLHFLAELCENHDPVLR                          |                                    |                             |                      |                    |            | 872               |       |
| hFMNL1     | IPRLPERMTTLTFLGNFPDQAQLLMPQNLAI                | IAASMSIKSSDKLRQILEIVLAFGNMNGNTRGQADGYSLEILPKLVKS | ADQKMTLLHFLAELCENHDPVLR                          |                                    |                             |                      |                    |            | 896               |       |
| mDelphilin | VPEYKTRLSLHFQATLQKTEETIRGSLBCLRQASLELKN        | SKLAKILBFLVAMGNVLDGQPKTKNTKTFGKINFLTELNSKT       | VDGKSTFLHILAKLSQHPPELLG                          |                                    |                             |                      |                    |            | 1072              |       |
| Dm_CapuCT  | -----GVHPLEIRLPIPEPADVERAAQMDFEVQQQIFD         | LNKKFLGCKRRTAKVL                                 | AASRPEIMEFPKSKMEEFVGEADKSMAKLHQSL                | DECRDLFLETMR                       | F975                        |                      |                    |            |                   |       |
| mFmn1      | LFSLYFHIAVHPQRKSGLELQKQAGTKSVFPLPEPQDF         | FLASQVFKEDLLKDLRKRQLEASEQMKLV                    | KESPREYLPQPKDKLEFFFKAKKEHKMEESHLENAQK            | SFETTVGY1381                       |                             |                      |                    |            |                   |       |
| hFMN1      | -----EAGTEKSVFPLPEPQDFFLASQVFKEDLLKDLRKR       | QLEASEQMKLV                                      | KESPEYLPQPKDKLEFFFKAKKEHKMEESHLENAQK             | SFETTVRY1334                       |                             |                      |                    |            |                   |       |
| mFmn2      | -----DAGKEQCVFLAEPQELFQASQMKFEDFQKDLRKL        | KDKLACAEAGKVV                                    | QVSSAEHMOPFKNEMEQFIQAKIDQEAENSLTETHKCFLETTAY1500 |                                    |                             |                      |                    |            |                   |       |
| hFMN2      | -----DAGKEQCVFLAEPQELFQASQMKFEDFQKDLRKL        | KDKLACAEAGKVV                                    | QVSSAEHMOPFKNEMEQFIQAKIDQEAENSLTETHKCFLETTAY1645 |                                    |                             |                      |                    |            |                   |       |
| mFHOD1     | -----LYSEIPALTRCAKVDPEQLTENLQLECRSQA           | ABDSLRSL                                         | AKHLSPALRARLTHFLAQCTHRVAMERVVHRRVCRN             | FPALFLY922                         |                             |                      |                    |            |                   |       |
| YsBni1     | -----FLSELEPVLVDVVKVSI                         | EQLVNDCKDFSQSIVNVSERVEIGNLSDS                    | SKFPHLDPKVLIKTLFVLPPEARCKGDLLEDEVKLT             | IMEFESLMHT1715                     |                             |                      |                    |            |                   |       |
| mDia1      | -----FPDELAHVKA                                | SRSVAENLQKSLDQMKQIADVERDVQNF                     | PAATDEKDKFVEKMTS                                 | FVKDAQEQYNKLRMMHNMETIYKELGDY1104   |                             |                      |                    |            |                   |       |
| mDia2      | -----FPDELEHVES                                | SAGIILKSNLVAEQSILHLEKNIKNF                       | PPAESHHDKFVEKMTS                                 | FQVQYKQYDQKSTHMSNMLKLYESLGEY975    |                             |                      |                    |            |                   |       |
| mDia3      | -----FVDDLHLDKAS                               | RVSMELEKNVQMGRLQOLEKNTFT                         | PPEDLHDKFVIKMS                                   | SFVIANEQYKELSTLGLSGMTLYQSIMGY962   |                             |                      |                    |            |                   |       |
| mINF2      | -----LSRDLEPPSQA                               | AGINVEIHSSEASANKKLEAERKVSAS                      | IP                                               | EVQKYAERIQASI-EASQE                | LKVFDAIEQKLELADY929         |                      |                    |            |                   |       |
| mDAAM1     | -----LSEELRDP                                  | QAAKVNMTLEDKEISTLRSGLKAVETELEYQ                  | KSQPPQGDK                                        | FVSVSQFITLASFSDVEDLLEAEKLFKAVKH958 |                             |                      |                    |            |                   |       |
| hFMNL1     | -----FHSDLHLDKAS                               | RVSLSVLDVRSLQGLTQREFVQR                          | DD                                               | CMVLKFEFRANSPTMDKLLADSKTAQEA       | FESVVEY973                  |                      |                    |            |                   |       |
| mDelphilin | -----FAQDLTPVPLAAKVNQALTDGLADLHDTVSE           | TQVACQS                                          | MAPSSDRFAVVMASFLBETAQPALRALDGLQREAMEL            | GKALAF1155                         |                             |                      |                    |            |                   |       |
| Dm_CapuCT  | YFSPKACTLTLAQCTPDQFFEYWNFTNDFKDIWKKEITS        | SLNELMKSKQAQIESRRN1035                           |                                                  |                                    |                             |                      |                    |            |                   |       |
| mFmn1      | FGMKPKTGE                                      | KEVTPSYVFMVWFECSDFKTIWKRESKNIKSKERL              | KMAQASVSKL                                       | 1435                               |                             |                      |                    |            |                   |       |
| hFMN1      | FGMKPKSGE                                      | KEITPSYVFMVWFECSDFKTIWKRESKNIKSKERL              | KMAQASVSKL                                       | 1388                               |                             |                      |                    |            |                   |       |
| mFmn2      | YFMKPKLGE                                      | KEVSPNVFVSWHEFSSDFKDAWKENKILQ                    | ERVKAEAEVCRQK                                    | 1554                               |                             |                      |                    |            |                   |       |
| hFMN2      | FFMKPKLGE                                      | KEVSPNAPFISWHEFSSDFKDFWCKENKILQ                  | ERVKAEAEVCRQK                                    | 1698                               |                             |                      |                    |            |                   |       |
| mFHOD1     | LDGTYTQA                                       | RDVRIMQFCHTLREFALEYRTRCERVLQ                     | QQQKRAYRE                                        | 1040                               |                             |                      |                    |            |                   |       |
| YsBni1     | YGEDSGDK                                       | PAKISFPKFKADFINYKKAQAQNLAAE                      | EEERLYIKHKIVVE                                   | 1767                               |                             |                      |                    |            |                   |       |
| mDia1      | FVDPKPK                                        | LSVEEFPMDLHFRNMFLOAVKENQ                         | RRTEKEMRRA                                       | 1149                               |                             |                      |                    |            |                   |       |
| mDia2      | FIDPNT                                         | VNMEEFQDGLNFRFLALEALKENHK                        | RKEMEEKSRA                                       | 1019                               |                             |                      |                    |            |                   |       |
| mDia3      | YAVDMKK                                        | VSVVEEFDNLNFRFSFALALKENIK                        | KRAAEKERA                                        | 1007                               |                             |                      |                    |            |                   |       |
| mINF2      | LCEDPQQ                                        | LSLEDTFSTMTKTRDLFRALKENK                         | RKEQMAKAERRK                                     | 974                                |                             |                      |                    |            |                   |       |
| mDAAM1     | FGEEAGK                                        | IQPDEFFGFDQFLQAVAEAKQENEN                        | MRKRKEEERA                                       | 1003                               |                             |                      |                    |            |                   |       |
| hFMNL1     | FGENPKT                                        | TSPGLFFSLSRF                                     | IKAYKABQVEQ                                      | WKKEAAEQAGA                        | 1018                        |                      |                    |            |                   |       |
| mDelphilin | FGEDSKA                                        | TTSEAFPIFSFMSKFERALSDLOA                         | GDGP                                             | RSS                                | 1195                        |                      |                    |            |                   |       |

**Figure S1. Sequence conservation between different forms.** Sequence alignment of several forms. Sequences were acquired from Uniprot (*Drosophila* Capu, Q24120; mouse Fmn1, Q05860; mouse Fmn2, Q9JL04; human FMN1, Q68DA7; human FMN2, Q9NZ56; mouse Dia1, O08808; mouse Dia2, O70566; mouse Dia3, Q9Z207; mouse INF2, Q0GNC1; mouse Daam1, Q8BPM0; mouse FHOD1, Q6P9Q4; human FMNL1, O95466; mouse Delphilin, Q0QWG9; *S. cerevisiae* Bni1p, P41832) and

aligned using ClustalW(Larkin *et al.*, 2007). Mutated residues are highlighted in their respective colors: K586 (blue), P597 (green), D662 (red), I751 (orange), L768 (turquoise), D854 (olive), H977 (purple). Identity matches are highlighted in the same color, while similar residues are shown in a colored font. Deleted residues in CapuCT $\Delta$ loop are highlighted in black. The two conserved tryptophan residues are bolded and highlighted in gray.

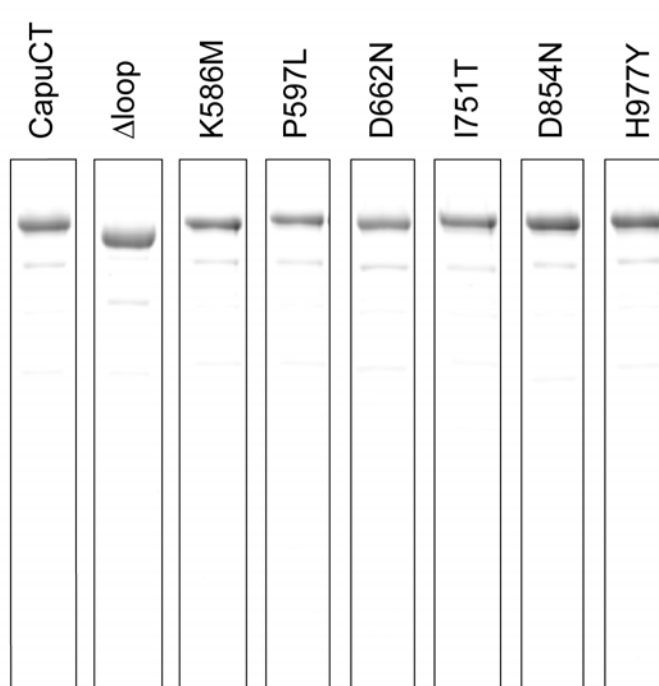

**Figure S2. Purified CapuCT constructs used in this study.** Approximately 2 ug of each purified protein was run on a polyacrylamide gel and stained for total protein with Sypro Red. For all samples, CapuCT is the most abundant protein.

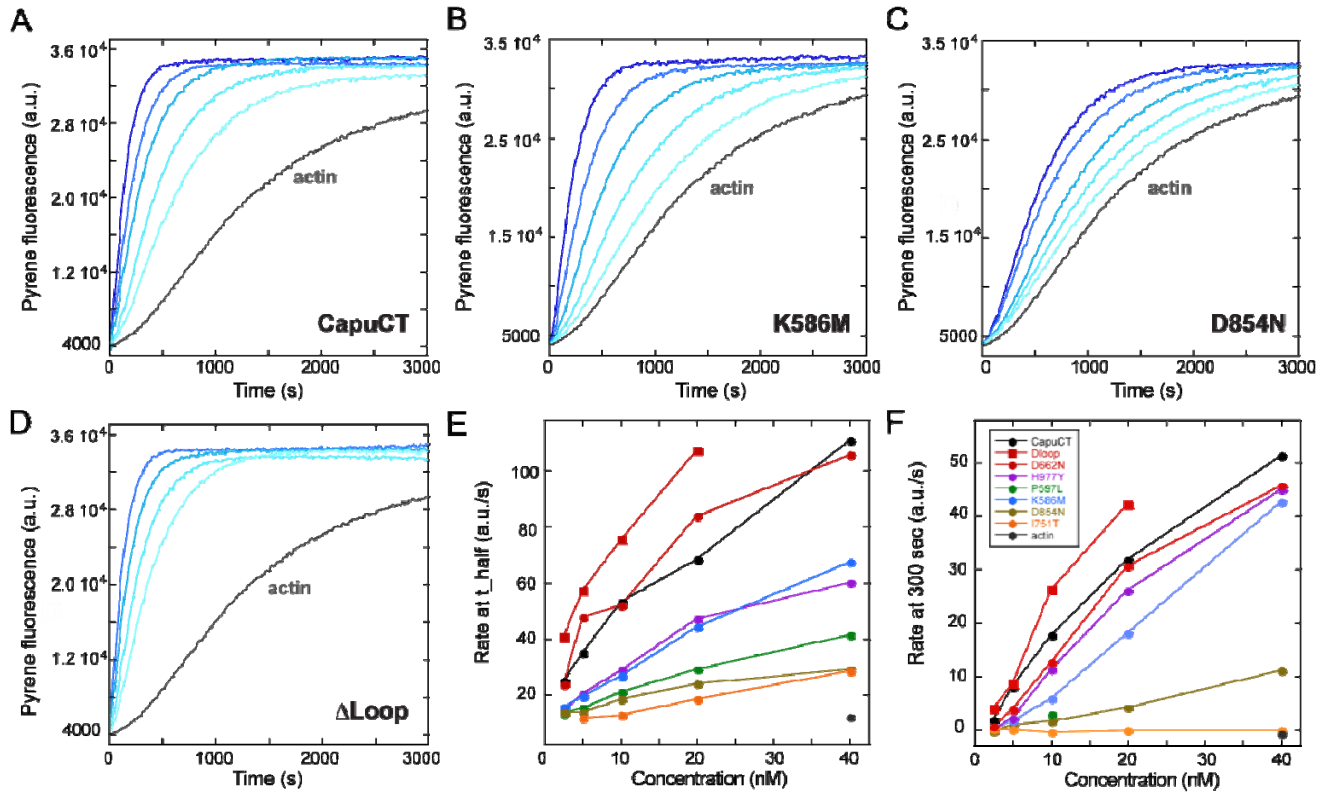

**Figure S3. Bulk actin assembly activity of CapuCT constructs over a range of concentrations.**

CapuCT mutants were tested for their actin-assembly activity both in the absence (A-E) and the presence (F) of *S. pombe* profilin over a range of concentrations. (A-D) Four sets of representative traces showing the dose-dependent activity of CapuCT and selected mutants. The concentrations used are, from dark blue to light blue, 40 nM, 20 nM, 10 nM, 5 nM, and 2.5 nM CapuCT. (E) The actin polymerization rate (slope) at  $t_{1/2}$  in the absence of profilin. (F) The actin polymerization rate (slope) at 300 s in the presence of profilin. The legend for panels (E) and (F) is shown in as an inset in panel (F).

### Supplementary References

Larkin, M. A. *et al.* (2007). Clustal W and Clustal X version 2.0. *Bioinformatics* 23, 2947–2948.
